# Supplementary material
Source: publisher figshare collection journal article supplement (https://rs.figshare.com/ndownloader/files/13643411)
Supplement: Supplementary file 1 [file 13643411]

	Vial	Genotype	Type	observation.total	court.f-f	aggre.f-f
1	eTIR/1	Masculinised	Experimental	1485	361	11
2	eTIR/2	Masculinised	Experimental	1650	359	11
3	eTIR/3	Masculinised	Experimental	1545	492	6
4	eTIR/4	Masculinised	Experimental	1485	322	4
5	eTIR/5	Masculinised	Experimental	1465	323	11
6	eTIR/6	Masculinised	Experimental	1505	337	17
7	eTIR/7	Masculinised	Experimental	1465	456	9
8	eTIR/8	Masculinised	Experimental	1505	325	4
9	eTIR/9	Masculinised	Experimental	1570	293	7
10	eTIR/10	Masculinised	Experimental	1610	407	4
11	CTIR/1	control-traIR	Control	1650	0	0
12	CTIR/2	control-traIR	Control	1650	0	0
13	CTIR/3	control-traIR	Control	1650	0	0
14	CTIR/4	control-traIR	Control	1650	0	0
15	CTIR/5	control-traIR	Control	1485	0	0
16	CTIR/6	control-traIR	Control	1650	0	0
17	CTIR/7	control-traIR	Control	1650	0	0
18	ecf/1	control-elav	Control	1650	0	0
19	ecf/2	control-elav	Control	1650	0	0
20	ecf/3	control-elav	Control	1650	0	0
21	ecf/4	control-elav	Control	1650	0	0
22	ecf/5	control-elav	Control	1650	0	0
23	ecf/6	control-elav	Control	1610	0	0
24	ecf/7	control-elav	Control	1650	0	2
